# Supplementary material
Source: publisher figshare collection journal article supplement (https://sage.figshare.com/ndownloader/files/15203132)
Supplement: Supplementary file 1 [file 15203132]

**Appendix A: Election surveys included in the analyses (*N*=22)**

| Switzerland | Zurich: 2011 federal election |
| --- | --- |
|  | Lucerne: 2011 federal election |
| France | Île-de-France: 2012 legislative election; 2014 municipal election (Paris); 2014 European election |
|  | Provence: 2012 legislative election; 2014 municipal election (Marseille); 2014 European election |
| Spain | Catalonia: 2011 national election; 2012 regional election; 2014 European election |
|  | Madrid: 2011 national election; 2014 European election |
| Germany | Lower Saxony: 2013 state election; 2013 federal election; 2014 European election |
|  | Bavaria: 2013 state election |
| Canada | Ontario: 2011 provincial election; 2015 federal election |
|  | Quebec: 2012 provincial election; 2015 federal election |
|  | British Columbia: 2015 federal election |

**Appendix B: Number of respondents from each survey and in total**

| 2011 Swiss federal election (Lucerne) | 753 |
| --- | --- |
| 2011 Swiss federal election (Zurich) | 754 |
| 2012 French legislative election (IDF) | 641 |
| 2012 French legislative election (Provence) | 622 |
| 2011 Spanish national election (Catalonia) | 686 |
| 2012 Spanish regional election (Catalonia) | 713 |
| 2011 Spanish national election (Madrid) | 717 |
| 2013 German federal election (Lower Saxony) | 650 |
| 2013 German state election (Lower Saxony) | 659 |
| 2013 German state election (Bavaria) | 3,918 |
| 2011 Canadian provincial election (Ontario) | 797 |
| 2012 Canadian provincial election (Quebec) | 636 |
| 2014 French European election (Provence) | 690 |
| 2014 French European election (IDF) | 665 |
| 2014 German European election (Lower Saxony) | 631 |
| 2014 Spanish European election (Catalonia) | 674 |
| 2014 Spanish European election (Madrid) | 679 |
| 2014 French municipal election (Paris) | 735 |
| 2014 French municipal election (Marseille) | 440 |
| 2015 Canadian federal election (Ontario) | 1,199 |
| 2015 Canadian federal election (British Columbia) | 1,097 |
| 2015 Canadian federal election (Quebec) | 1,096 |
| Total | 19,452 |

**Appendix C: Question wordings of dependent and independent variables**

| Satisfaction with decision to vote | [Given the outcome of the current election] Do you think the decision to vote was a very good decision, a fairly good decision, a fairly bad decision, or a very bad decision? |
| --- | --- |
| Satisfaction with decision to abstain | [Given the outcome of the current election] Do you think the decision to NOT vote was a very good decision, a fairly good decision, a fairly bad decision, or a very bad decision? |
| Civic duty | People have different views about voting. For some, voting is a [duty/choice]. For others, voting is a [choice/duty]. For you personally, is voting FIRST AND FOREMOST a Duty or a Choice? |
| Political interest | On a scale from 0 to 10, where 0 means 'no interest at all' and 10 means 'a great deal of interest', how much interest do you have in politics generally? |
| Partisanship | Do you usually think of yourself as close to any particular political party? |
| Difficulty to vote | For some people voting is a simple and easy thing to do. For others, it is difficult or inconvenient. For you personally, how easy or difficult is it to vote? (Very difficult, somewhat difficult, somewhat easy, Very easy) |
| Vote for winner/loser party | Would you say that the party you voted for won the election or lost the election? |

**Appendix D: Replication of Table 3, columns 1 and 3, with non-dichotomized dependent variables**

|  | Decision  to vote | Decision  to abstain |
| --- | --- | --- |
| Voting is a duty | 0.608*** | -0.777*** |
|  | (0.037) | (0.092) |
| Interested in politics | 0.563*** | -0.463*** |
|  | (0.037) | (0.091) |
| Partisan | 0.578*** | -0.647*** |
|  | (0.037) | (0.102) |
| Voting is difficult | -0.460*** | -0.002 |
|  | (0.047) | (0.097) |
| 35+ | 0.257*** | 0.343*** |
|  | (0.047) | (0.100) |
| Highly Educated | 0.147***  (0.042) | -0.074  (0.101) |
| Female | 0.037  (0.035) | -0.448***  (0.088) |
| Outcome prime | -0.541*** | 0.255** |
|  | (0.035) | (0.085) |
| *N* | 17,561 | 1,891 |
| *Mcfadden’s Pseudo R2* | 0.217 | 0.291 |

Note: Ordered logit coefficients and standard errors (in parentheses). The estimations include dummy variables for each election survey. Significance levels: * *p* < 0.05, ** *p* < 0.01, *** *p* < 0.001.

**Appendix E1: Replication of Table 3, column 1, by country**

|  | **Decision to vote** | | | | |
| --- | --- | --- | --- | --- | --- |
|  | **Switzerland** | **France** | **Spain** | **Germany** | **Canada** |
| Voting is a duty | 0.549*** | 0.862*** | 0.677*** | 0.445*** | 0.708*** |
|  | (0.137) | (0.090) | (0.082) | (0.064) | (0.086) |
| Interested in politics | 1.174*** | 0.459*** | 0.455*** | 0.621*** | 0.489*** |
|  | (0.144) | (0.092) | (0.080) | (0.068) | (0.081) |
| Partisan | 0.403** | 0.485*** | 0.568*** | 0.768*** | 0.479*** |
|  | (0.132) | (0.092) | (0.086) | (0.065) | (0.081) |
| Outcome prime | -0.852*** | -0.259** | -0.042 | -0.655*** | -0.843*** |
|  | (0.131) | (0.087) | (0.077) | (0.062) | (0.076) |
| Voting is difficult | -0.552*** | -0.229 | -0.501*** | -0.400*** | -0.583*** |
|  | (0.158) | (0.119) | (0.110) | (0.082) | (0.115) |
| 35+ | 0.163 | 0.531*** | 0.238* | 0.090 | 0.295** |
|  | (0.193) | (0.115) | (0.103) | (0.086) | (0.103) |
| Highly educated | 0.358** | 0.007 | 0.179 | 0.137* | 0.155 |
|  | (0.136) | (0.096) | (0.147) | (0.069) | (0.093) |
| Female | 0.271* | 0.044 | -0.153 | 0.017 | 0.130 |
|  | (0.136) | (0.088) | (0.079) | (0.063) | (0.077) |
| Constant | -0.458 | -0.358 | -0.775*** | 0.122 | 0.080 |
|  | (0.246) | (0.190) | (0.147) | (0.138) | (0.174) |
| *N* | 1,339 | 3,191 | 3,089 | 5,450 | 4,492 |
| *Mcfadden’s Pseudo R2* | 0.126 | 0.065 | 0.069 | 0.085 | 0.084 |

Note: Logit coefficients and White’s robust standard errors (in parentheses). Significance levels: * *p* < 0.05, ** *p* < 0.01, *** *p* < 0.001. The estimations also include dummy variables for each election survey.

**Appendix E2: Replication of Table 3, column 3, by country**

|  | **Decision to abstain** | | | | |
| --- | --- | --- | --- | --- | --- |
|  | **Switzerland** | **France** | **Spain** | **Germany** | **Canada** |
| Voting is a duty | -0.163 | -0.935*** | -0.635* | -0.577 | -0.461 |
|  | (0.620) | (0.209) | (0.259) | (0.324) | (0.278) |
| Interested in politics | -0.277 | -0.330 | -0.541* | -0.404 | -0.416 |
|  | (0.617) | (0.206) | (0.268) | (0.260) | (0.293) |
| Partisan | -1.805 | -0.581** | -0.825* | -0.804* | -0.557 |
|  | (0.957) | (0.212) | (0.363) | (0.395) | (0.335) |
| Outcome prime | 0.104 | 0.184 | -0.153 | -0.182 | 0.468 |
|  | (0.594) | (0.195) | (0.241) | (0.258) | (0.254) |
| Voting is difficult | 0.042 | 0.071 | -0.306 | -0.007 | -0.009 |
|  | (0.529) | (0.218) | (0.281) | (0.317) | (0.280) |
| 35+ | -0.461 | 0.231 | 0.744* | 1.006** | 0.397 |
|  | (0.602) | (0.235) | (0.299) | (0.390) | (0.318) |
| Highly educated | -0.225 | -0.207 | -0.276 | 0.123 | -0.135 |
|  | (0.640) | (0.200) | (0.464) | (0.321) | (0.283) |
| Female | -0.243 | -0.611** | -0.466 | -0.825** | -0.472 |
|  | (0.569) | (0.199) | (0.246) | (0.258) | (0.266) |
| Constant | -1.661* | -0.0003 | -0.290 | -0.841 | -1.014 |
|  | (0.798) | (0.384) | (0.439) | (0.534) | (0.530) |
| *N* | 168 | 602 | 380 | 408 | 333 |
| *Mcfadden’s Pseudo R2* | 0.068 | 0.097 | 0.102 | 0.074 | 0.054 |

Note: Logit coefficients and White’s robust standard errors (in parentheses). Significance levels: * *p* < 0.05, ** *p* < 0.01, *** *p* < 0.001. The estimations also include dummy variables for each election survey.

**Appendix F: Replication of Table 3, columns 1 and 3, with dummies for national elections**

|  | Decision to vote | Decision  to abstain |
| --- | --- | --- |
| Voting is a duty | 0.606*** | -0.725*** |
|  | (0.044) | (0.143) |
| Interested in politics | 0.511*** | -0.467*** |
|  | (0.046) | (0.136) |
| Partisan | 0.621*** | -0.522** |
|  | (0.046) | (0.159) |
| Outcome prime | -0.430*** | 0.090 |
|  | (0.044) | (0.127) |
| Voting is difficult | -0.328*** | -0.094 |
|  | (0.059) | (0.150) |
| 35+ | 0.275*** | 0.464** |
|  | (0.061) | (0.158) |
| Highly educated | 0.234*** | 0.034 |
|  | (0.045) | (0.130) |
| Female | -0.002 | -0.605*** |
|  | (0.044) | (0.130) |
| National election | -0.104 | -0.267 |
|  | (0.128) | (0.378) |
| National election * Voting is a duty | 0.068 | 0.507 |
|  | (0.074) | (0.273) |
| National election * Interested in politics | 0.073 | 0.366 |
|  | (0.077) | (0.268) |
| National election * Partisan | -0.012 | -0.287 |
|  | (0.078) | (0.343) |
| National election * Outcome prime | -0.219** | -0.071 |
|  | (0.073) | (0.244) |
| National election * Voting is difficult | -0.287** | 0.016 |
|  | (0.101) | (0.264) |
| National election * 35+ | 0.017 | -0.177 |
|  | (0.099) | (0.303) |
| National election * Highly educated | 0.295*** | -0.020 |
|  | (0.074) | (0.254) |
| National election * Female | 0.120 | 0.119 |
|  | (0.075) | (0.249) |
| Constant | -0.133 | -0.551** |
|  | (0.077) | (0.189) |
| *N* | 17,561 | 1,891 |
| Note: Logit coefficients and standard errors (in parentheses). Significance levels: * *p* < 0.05, ** *p* < 0.01, *** *p* < 0.001. | | |
